# Supplementary material for: Fourier-transform microwave spectroscopy of the ClCO radical
Source: Royal Society of Chemistry journal article supplement (doi:10.1039/d4cp03723e), 2024-01-01
Supplement: d4cp03723e1.pdf [file d4cp03723e1.pdf]

Supplemental Material  
Fourier-transform microwave spectroscopy of  
the ClCO radical

C. H. Chang, C. H. Tsai, and Yasuki Endo

**Table S1.** Observed transition frequencies of the  $^{35}\text{ClCO}$  radical. (in MHz)

| $N'$ | $K_a'$ | $K_c'$ | $J'$ | $F'$ | $N$ | $K_a$ | $K_c$ | $J$ | $F$ | Observed  | Calculated | O.-C.  |
|------|--------|--------|------|------|-----|-------|-------|-----|-----|-----------|------------|--------|
| 1    | 0      | 1      | 0.5  | 1.0  | 0   | 0     | 0     | 0.5 | 2.0 | 11429.552 | 11429.552  | 0.000  |
| 1    | 0      | 1      | 0.5  | 2.0  | 0   | 0     | 0     | 0.5 | 2.0 | 11461.819 | 11461.816  | 0.003  |
| 1    | 0      | 1      | 1.5  | 0.0  | 0   | 0     | 0     | 0.5 | 1.0 | 11435.798 | 11435.796  | 0.002  |
| 1    | 0      | 1      | 1.5  | 1.0  | 0   | 0     | 0     | 0.5 | 1.0 | 11398.419 | 11398.419  | 0.000  |
| 1    | 0      | 1      | 1.5  | 2.0  | 0   | 0     | 0     | 0.5 | 1.0 | 11427.876 | 11427.875  | 0.001  |
| 1    | 0      | 1      | 1.5  | 2.0  | 0   | 0     | 0     | 0.5 | 2.0 | 11191.925 | 11191.925  | 0.000  |
| 1    | 0      | 1      | 1.5  | 3.0  | 0   | 0     | 0     | 0.5 | 2.0 | 11399.862 | 11399.860  | 0.002  |
| 2    | 0      | 2      | 1.5  | 0.0  | 1   | 0     | 1     | 0.5 | 1.0 | 22862.010 | 22862.011  | -0.001 |
| 2    | 0      | 2      | 1.5  | 1.0  | 1   | 0     | 1     | 0.5 | 1.0 | 22869.080 | 22869.081  | -0.001 |
| 2    | 0      | 2      | 1.5  | 1.0  | 1   | 0     | 1     | 0.5 | 2.0 | 22836.816 | 22836.817  | -0.001 |
| 2    | 0      | 2      | 1.5  | 2.0  | 1   | 0     | 1     | 0.5 | 1.0 | 22875.341 | 22875.342  | -0.001 |
| 2    | 0      | 2      | 1.5  | 2.0  | 1   | 0     | 1     | 0.5 | 2.0 | 22843.079 | 22843.078  | 0.001  |
| 2    | 0      | 2      | 1.5  | 3.0  | 1   | 0     | 1     | 0.5 | 2.0 | 22843.057 | 22843.060  | -0.003 |
| 2    | 0      | 2      | 1.5  | 3.0  | 1   | 0     | 1     | 1.5 | 2.0 | 23112.951 | 23112.950  | 0.001  |
| 2    | 0      | 2      | 1.5  | 3.0  | 1   | 0     | 1     | 1.5 | 3.0 | 22905.014 | 22905.015  | -0.001 |
| 2    | 0      | 2      | 2.5  | 1.0  | 1   | 0     | 1     | 1.5 | 0.0 | 22823.173 | 22823.173  | 0.000  |
| 2    | 0      | 2      | 2.5  | 1.0  | 1   | 0     | 1     | 1.5 | 1.0 | 22860.550 | 22860.549  | 0.001  |
| 2    | 0      | 2      | 2.5  | 1.0  | 1   | 0     | 1     | 1.5 | 2.0 | 22831.091 | 22831.094  | -0.003 |
| 2    | 0      | 2      | 2.5  | 2.0  | 1   | 0     | 1     | 1.5 | 1.0 | 22847.048 | 22847.048  | 0.000  |
| 2    | 0      | 2      | 2.5  | 2.0  | 1   | 0     | 1     | 1.5 | 2.0 | 22817.592 | 22817.593  | -0.001 |
| 2    | 0      | 2      | 2.5  | 3.0  | 1   | 0     | 1     | 1.5 | 2.0 | 22847.901 | 22847.901  | 0.000  |
| 2    | 0      | 2      | 2.5  | 3.0  | 1   | 0     | 1     | 1.5 | 3.0 | 22639.967 | 22639.966  | 0.001  |
| 2    | 0      | 2      | 2.5  | 4.0  | 1   | 0     | 1     | 1.5 | 3.0 | 22826.621 | 22826.620  | 0.001  |
| 3    | 0      | 3      | 2.5  | 1.0  | 2   | 0     | 2     | 1.5 | 0.0 | 34293.166 | 34293.164  | 0.002  |
| 3    | 0      | 3      | 2.5  | 1.0  | 2   | 0     | 2     | 1.5 | 1.0 | 34286.094 | 34286.094  | 0.000  |
| 3    | 0      | 3      | 2.5  | 2.0  | 2   | 0     | 2     | 1.5 | 1.0 | 34288.059 | 34288.060  | -0.001 |
| 3    | 0      | 3      | 2.5  | 2.0  | 2   | 0     | 2     | 1.5 | 2.0 | 34281.799 | 34281.798  | 0.001  |
| 3    | 0      | 3      | 2.5  | 3.0  | 2   | 0     | 2     | 1.5 | 2.0 | 34279.490 | 34279.494  | -0.004 |
| 3    | 0      | 3      | 2.5  | 3.0  | 2   | 0     | 2     | 1.5 | 3.0 | 34279.516 | 34279.512  | 0.004  |
| 3    | 0      | 3      | 2.5  | 4.0  | 2   | 0     | 2     | 1.5 | 3.0 | 34269.500 | 34269.502  | -0.002 |
| 3    | 0      | 3      | 3.5  | 2.0  | 2   | 0     | 2     | 2.5 | 1.0 | 34256.995 | 34256.996  | -0.001 |
| 3    | 0      | 3      | 3.5  | 2.0  | 2   | 0     | 2     | 2.5 | 2.0 | 34270.496 | 34270.497  | -0.001 |
| 3    | 0      | 3      | 3.5  | 3.0  | 2   | 0     | 2     | 2.5 | 2.0 | 34263.938 | 34263.938  | 0.000  |
| 3    | 0      | 3      | 3.5  | 3.0  | 2   | 0     | 2     | 2.5 | 3.0 | 34233.630 | 34233.629  | 0.001  |
| 3    | 0      | 3      | 3.5  | 4.0  | 2   | 0     | 2     | 2.5 | 3.0 | 34267.680 | 34267.680  | 0.000  |
| 3    | 0      | 3      | 3.5  | 5.0  | 2   | 0     | 2     | 2.5 | 4.0 | 34250.238 | 34250.237  | 0.001  |

**Table S2.** Observed transition frequencies of the  $^{37}\text{ClCO}$  radical. (in MHz)

| $N'$ | $K_a'$ | $K_c'$ | $J'$ | $F'$ | $N$ | $K_a$ | $K_c$ | $J$ | $F$ | Observed  | Calculated | O.-C.  |
|------|--------|--------|------|------|-----|-------|-------|-----|-----|-----------|------------|--------|
| 1    | 0      | 1      | 0.5  | 1.0  | 0   | 0     | 0     | 0.5 | 2.0 | 11181.371 | 11181.373  | -0.002 |
| 1    | 0      | 1      | 0.5  | 2.0  | 0   | 0     | 0     | 0.5 | 2.0 | 11208.409 | 11208.408  | 0.001  |
| 1    | 0      | 1      | 1.5  | 0.0  | 0   | 0     | 0     | 0.5 | 1.0 | 11180.704 | 11180.701  | 0.003  |
| 1    | 0      | 1      | 1.5  | 1.0  | 0   | 0     | 0     | 0.5 | 1.0 | 11152.185 | 11152.185  | 0.000  |
| 1    | 0      | 1      | 1.5  | 2.0  | 0   | 0     | 0     | 0.5 | 1.0 | 11177.181 | 11177.182  | -0.001 |
| 1    | 0      | 1      | 1.5  | 3.0  | 0   | 0     | 0     | 0.5 | 2.0 | 11151.240 | 11151.240  | 0.000  |
| 2    | 0      | 2      | 1.5  | 0.0  | 1   | 0     | 1     | 0.5 | 1.0 | 22363.586 | 22363.580  | 0.006  |
| 2    | 0      | 2      | 1.5  | 1.0  | 1   | 0     | 1     | 0.5 | 1.0 | 22368.523 | 22368.524  | -0.001 |
| 2    | 0      | 2      | 1.5  | 1.0  | 1   | 0     | 1     | 0.5 | 2.0 | 22341.489 | 22341.489  | 0.000  |
| 2    | 0      | 2      | 1.5  | 2.0  | 1   | 0     | 1     | 0.5 | 1.0 | 22372.709 | 22372.709  | 0.000  |
| 2    | 0      | 2      | 1.5  | 2.0  | 1   | 0     | 1     | 0.5 | 2.0 | 22345.673 | 22345.673  | 0.000  |
| 2    | 0      | 2      | 1.5  | 3.0  | 1   | 0     | 1     | 0.5 | 2.0 | 22344.379 | 22344.382  | -0.003 |
| 2    | 0      | 2      | 1.5  | 2.0  | 1   | 0     | 1     | 1.5 | 3.0 | 22402.841 | 22402.841  | 0.000  |
| 2    | 0      | 2      | 1.5  | 3.0  | 1   | 0     | 1     | 1.5 | 3.0 | 22401.549 | 22401.550  | -0.001 |
| 2    | 0      | 2      | 2.5  | 1.0  | 1   | 0     | 1     | 1.5 | 0.0 | 22326.329 | 22326.329  | 0.000  |
| 2    | 0      | 2      | 2.5  | 1.0  | 1   | 0     | 1     | 1.5 | 1.0 | 22354.846 | 22354.846  | 0.000  |
| 2    | 0      | 2      | 2.5  | 2.0  | 1   | 0     | 1     | 1.5 | 1.0 | 22345.741 | 22345.743  | -0.002 |
| 2    | 0      | 2      | 2.5  | 2.0  | 1   | 0     | 1     | 1.5 | 2.0 | 22320.748 | 22320.745  | 0.003  |
| 2    | 0      | 2      | 2.5  | 3.0  | 1   | 0     | 1     | 1.5 | 2.0 | 22347.137 | 22347.138  | -0.001 |
| 2    | 0      | 2      | 2.5  | 4.0  | 1   | 0     | 1     | 1.5 | 3.0 | 22327.555 | 22327.556  | -0.001 |
